# Supplementary material for: Highly selective fluorescent carbon dots probe for mercury(ii) based on thymine–mercury(ii)–thymine structure
Source: Royal Society of Chemistry journal article supplement (doi:10.1039/c7ra11487g), 2018-01-01
Supplement: c7ra11487g1.pdf [file c7ra11487g1.pdf]

## Supplementary Information

### **Highly selective fluorescent carbon dots probe of mercury(II) based on thymine-mercury(II)-thymine structure**

Yong Li, Zhan-Yao Zhang, Hao-Fan Yang, Guang Shao, Feng Gan\*

*School of Chemistry, Sun Yat-Sen University, Guangzhou 510275, P.R. China*

*\*Corresponding authors: E-mail addresses: cesgf@mail.sysu.edu.cn. Tel.: +86 20 84110918; Fax: +86 20 84110918.*

## List of Figures

|    |                                                                                                                                                                                                                                                                                                                                                                                                                                            |   |
|----|--------------------------------------------------------------------------------------------------------------------------------------------------------------------------------------------------------------------------------------------------------------------------------------------------------------------------------------------------------------------------------------------------------------------------------------------|---|
| S1 | Plot of the absorbance intensity at 270 nm as a function of thymine-1-acetic acid concentration in the presence of 100 $\mu\text{g}/\text{mL}$ the CDs-Thy (0.1 M PBS buffer, pH 7.4). . . . .                                                                                                                                                                                                                                             | 3 |
| S2 | (A) Fluorescence response of probe (0.1 mg/mL) in the absence (top line) and presence (bottom line) of $\text{Hg}^{2+}$ (33.3 $\mu\text{M}$ ), respectively. (B) Reaction-time profiles of probe (0.1 mg/mL) in the presence of $\text{Hg}^{2+}$ (1, 4, 30, and 50 $\mu\text{M}$ ). The fluorescence intensities at 441 nm were monitored in aqueous solution (0.2 M PBS buffer, pH 7.4) ( $\lambda_{ex} = 354$ nm, slit: 5/5 nm). . . . . | 4 |
| S3 | Linear plots of the fluorescence intensities of CDs-Thy (33.3 $\mu\text{g}/\text{mL}$ ) upon addition of $\text{Hg}^{2+}$ (0, 0.1, 0.2, 0.4, 0.6, 0.8, and 1.0 $\mu\text{M}$ ) in PBS buffer solution (0.1 M, pH 7.4). . . . .                                                                                                                                                                                                             | 6 |

## List of Tables

|    |                                                         |   |
|----|---------------------------------------------------------|---|
| S1 | Fluorescence lifetimes of CDs-PEI and CDs-Thy . . . . . | 7 |
|----|---------------------------------------------------------|---|

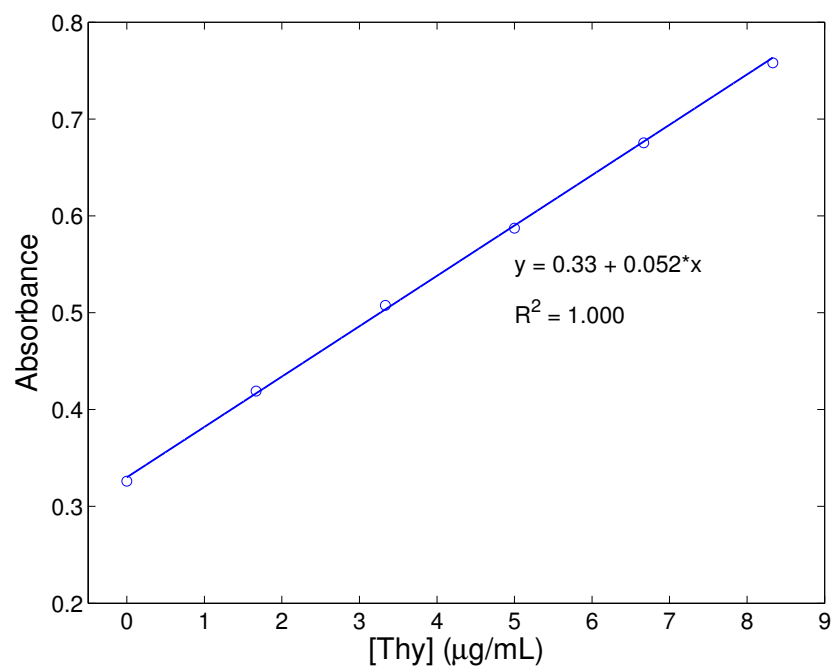

**Figure S1.** Plot of the absorbance intensity at 270 nm as a function of thymine-1-acetic acid concentration in the presence of 100 µg/mL the CDs-Thy (0.1 M PBS buffer, pH 7.4).

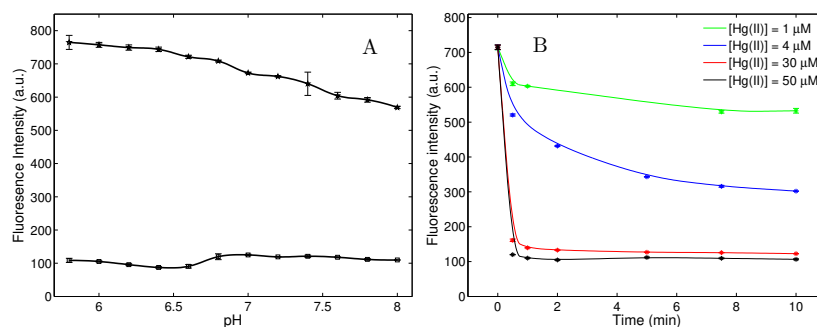

**Figure S2.** (A) Fluorescence response of probe (0.1 mg/mL) in the absence (top line) and presence (bottom line) of  $\text{Hg}^{2+}$  (33.3  $\mu\text{M}$ ), respectively. (B) Reaction-time profiles of probe (0.1 mg/mL) in the presence of  $\text{Hg}^{2+}$  (1, 4, 30, and 50  $\mu\text{M}$ ). The fluorescence intensities at 441 nm were monitored in aqueous solution (0.2 M PBS buffer, pH 7.4) ( $\lambda_{ex} = 354$  nm, slit: 5/5 nm).

Fig. S2A shows the fluorescent intensities of the CDs-Thy under different pH from pH 5.8 to 8.2 in the absence and presence of  $\text{Hg}^{2+}$ , respectively. Without  $\text{Hg}^{2+}$ , the fluorescence intensity of the CDs-Thy have a slightly decrease with the increasing of pH. But the fluorescence intensities still stayed at a strong emission level. Upon addition of  $\text{Hg}^{2+}$ , the fluorescence spectra of CDs-Thy had a relatively weak emission and remained unaffected during this pH range. Therefore, the CDs-Thy can successfully detect  $\text{Hg}^{2+}$  in the pH range from 5.8 to 8.2 and a PBS buffer (pH = 7.4) was chosen for all subsequent detection assays.

Fig. S2B shows the quenching kinetics of the CDs-Thy with different  $\text{Hg}^{2+}$  concentration at different time by recording the fluorescence spectra. The dramatic fluorescence quenching was observed within less than 30 seconds when 30  $\mu\text{M}$  and 30  $\mu\text{M}$   $\text{Hg}^{2+}$  was introduced into the sensing system containing 0.1 mg/mL

of the CDs-Thy, indicating that quenching kinetics was fairly fast. Moreover, the fluorescence emission was quenched to a stable state in 10 minutes even in the case of lower concentrations of  $\text{Hg}^{2+}$ . Thus, this sensing system could be used for the real-time monitoring of  $\text{Hg}^{2+}$  in practical analysis.

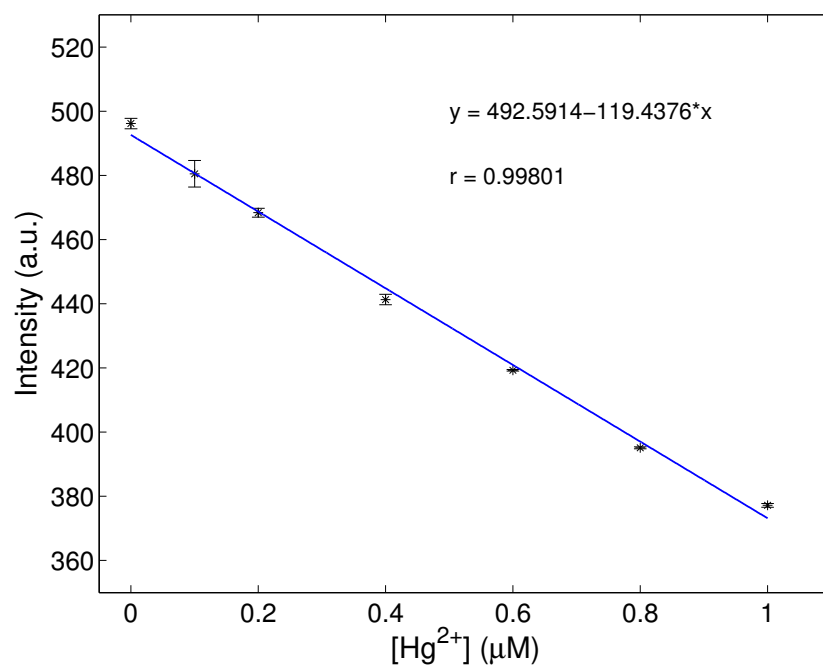

**Figure S3.** Linear plots of the fluorescence intensities of CDs-Thy (33.3 μg/mL) upon addition of Hg<sup>2+</sup> (0, 0.1, 0.2, 0.4, 0.6, 0.8, and 1.0 μM) in PBS buffer solution (0.1 M, pH 7.4).

**Table S1.** Fluorescence lifetimes of CDs-PEI and CDs-Thy

| Sample  | $\tau_1$ (ns) | $A_1$ | Percent (%) | $\tau_2$ (ns) | $A_2$ | Percent (%) | $\tau_{\text{avg}}$ (ns) |
|---------|---------------|-------|-------------|---------------|-------|-------------|--------------------------|
| CDs-PEI | 2.24          | 0.017 | 11.99       | 12.16         | 0.023 | 88.01       | 10.97                    |
| CDs-Thy | 3.81          | 0.017 | 19.27       | 11.69         | 0.023 | 80.73       | 10.17                    |

$\tau_1$  and  $\tau_2$  refer to the short and long lifetime, respectively.
